# Supplementary material for: Point of care ultrasound training for internal medicine: a Canadian multi-centre learner needs assessment study
Source: PubMed Central journal article supplement (PMC6149066; doi:10.1186/s12909-018-1326-8), 2018-09-20
Supplement: 12909_2018_1326_MOESM1_ESM.pdf [file 12909_2018_1326_MOESM1_ESM.pdf]

## Demographic

1. What year of residency are you in?

- PGY-1
- PGY-2
- PGY-3
- PGY-4
- PGY-5
- PGY-6 and beyond

2. Gender

- Male
- Female

3. How many procedures have you performed to date **with ultrasound**?

|                         | 0                     | 1-2                   | 3-5                   | 6-9                   | 10 or more            |
|-------------------------|-----------------------|-----------------------|-----------------------|-----------------------|-----------------------|
| Abdominal paracentesis  | <input type="radio"/> | <input type="radio"/> | <input type="radio"/> | <input type="radio"/> | <input type="radio"/> |
| Thoracentesis           | <input type="radio"/> | <input type="radio"/> | <input type="radio"/> | <input type="radio"/> | <input type="radio"/> |
| Central line insertion  | <input type="radio"/> | <input type="radio"/> | <input type="radio"/> | <input type="radio"/> | <input type="radio"/> |
| Peripheral IV insertion | <input type="radio"/> | <input type="radio"/> | <input type="radio"/> | <input type="radio"/> | <input type="radio"/> |

4. How many times have you encountered a situation when you would have wanted to perform an US-guided procedure but was not able to do so because of the lack of **supervisor/teacher** (and not because of the lack of US machine)?

- Never
- A few times
- Many times
- Most of the time
- Not applicable (please specify)

## Interest in learning

5. How applicable to your patient care and what are your personal needs in learning the following ultrasound applications?

|                                                     | How applicable to patient care in Internal Medicine | What are your own current skills/knowledge |
|-----------------------------------------------------|-----------------------------------------------------|--------------------------------------------|
| Determining the height of the internal jugular vein | <input type="text"/>                                | <input type="text"/>                       |
| Measuring IVC diameter / collapsibility index       | <input type="text"/>                                | <input type="text"/>                       |
| Identifying pleural effusion                        | <input type="text"/>                                | <input type="text"/>                       |
| Identifying pneumothorax                            | <input type="text"/>                                | <input type="text"/>                       |
| Identifying interstitial syndrome                   | <input type="text"/>                                | <input type="text"/>                       |
| Identifying lung consolidation                      | <input type="text"/>                                | <input type="text"/>                       |
| Identifying hepatomegaly                            | <input type="text"/>                                | <input type="text"/>                       |
| Identifying splenomegaly                            | <input type="text"/>                                | <input type="text"/>                       |
| Identifying ascites/free fluid                      | <input type="text"/>                                | <input type="text"/>                       |
| Identifying abscess/cellulitis                      | <input type="text"/>                                | <input type="text"/>                       |
| Identifying DVT                                     | <input type="text"/>                                | <input type="text"/>                       |
| Identifying hydronephrosis                          | <input type="text"/>                                | <input type="text"/>                       |
| Identifying gross LV function                       | <input type="text"/>                                | <input type="text"/>                       |
| Identifying RV strain                               | <input type="text"/>                                | <input type="text"/>                       |
| Identifying pericardial effusion                    | <input type="text"/>                                | <input type="text"/>                       |
| Using US for central line insertion                 | <input type="text"/>                                | <input type="text"/>                       |
| Using US for arterial line insertion                | <input type="text"/>                                | <input type="text"/>                       |
| Using US for peripheral IV insertion                | <input type="text"/>                                | <input type="text"/>                       |
| Using US for thoracentesis                          | <input type="text"/>                                | <input type="text"/>                       |

|                                                         | How applicable to patient care in Internal Medicine | What are your own current skills/knowledge |
|---------------------------------------------------------|-----------------------------------------------------|--------------------------------------------|
| Using US for paracentesis                               | <input type="text"/>                                | <input type="text"/>                       |
| Using US for joint aspiration                           | <input type="text"/>                                | <input type="text"/>                       |
| Using US for lumbar puncture                            | <input type="text"/>                                | <input type="text"/>                       |
| Using US for superficial abscess aspirates for sampling | <input type="text"/>                                | <input type="text"/>                       |
| Using US for PICC line insertion                        | <input type="text"/>                                | <input type="text"/>                       |
| Other (please specify)                                  | <input type="text"/>                                |                                            |

## Basic Ultrasound Knowledge and Use

**The following section seeks your general knowledge and ultrasound (US) skills. How would you rate your own knowledge/skills on the following?**

6. How would you rate your current level of knowledge or skills in the following domains?

|                                                            | Very Poor             | Poor                  | Fair                  | Good                  | Very Good             |
|------------------------------------------------------------|-----------------------|-----------------------|-----------------------|-----------------------|-----------------------|
| The ALARA principle (As low as reasonably achievable)      | <input type="radio"/> | <input type="radio"/> | <input type="radio"/> | <input type="radio"/> | <input type="radio"/> |
| B mode imaging                                             | <input type="radio"/> | <input type="radio"/> | <input type="radio"/> | <input type="radio"/> | <input type="radio"/> |
| M mode imaging                                             | <input type="radio"/> | <input type="radio"/> | <input type="radio"/> | <input type="radio"/> | <input type="radio"/> |
| Colour Doppler imaging                                     | <input type="radio"/> | <input type="radio"/> | <input type="radio"/> | <input type="radio"/> | <input type="radio"/> |
| Spectral Doppler imaging - Pulsed wave                     | <input type="radio"/> | <input type="radio"/> | <input type="radio"/> | <input type="radio"/> | <input type="radio"/> |
| Spectral Doppler imaging - continuous wave                 | <input type="radio"/> | <input type="radio"/> | <input type="radio"/> | <input type="radio"/> | <input type="radio"/> |
| Power Doppler imaging                                      | <input type="radio"/> | <input type="radio"/> | <input type="radio"/> | <input type="radio"/> | <input type="radio"/> |
| Ultrasound artifacts                                       | <input type="radio"/> | <input type="radio"/> | <input type="radio"/> | <input type="radio"/> | <input type="radio"/> |
| Transducer selection                                       | <input type="radio"/> | <input type="radio"/> | <input type="radio"/> | <input type="radio"/> | <input type="radio"/> |
| Sterile transducer techniques                              | <input type="radio"/> | <input type="radio"/> | <input type="radio"/> | <input type="radio"/> | <input type="radio"/> |
| Knobology                                                  | <input type="radio"/> | <input type="radio"/> | <input type="radio"/> | <input type="radio"/> | <input type="radio"/> |
| Ability to interpret findings - cardiac system             | <input type="radio"/> | <input type="radio"/> | <input type="radio"/> | <input type="radio"/> | <input type="radio"/> |
| Ability to interpret findings - pulmonary system           | <input type="radio"/> | <input type="radio"/> | <input type="radio"/> | <input type="radio"/> | <input type="radio"/> |
| Ability to interpret findings - GI system                  | <input type="radio"/> | <input type="radio"/> | <input type="radio"/> | <input type="radio"/> | <input type="radio"/> |
| Ability to interpret findings - GU system                  | <input type="radio"/> | <input type="radio"/> | <input type="radio"/> | <input type="radio"/> | <input type="radio"/> |
| Ability to interpret findings - soft tissues               | <input type="radio"/> | <input type="radio"/> | <input type="radio"/> | <input type="radio"/> | <input type="radio"/> |
| Ability to discern when image is insufficient / inadequate | <input type="radio"/> | <input type="radio"/> | <input type="radio"/> | <input type="radio"/> | <input type="radio"/> |
| Ability to archive images or cine-clips                    | <input type="radio"/> | <input type="radio"/> | <input type="radio"/> | <input type="radio"/> | <input type="radio"/> |

7. Do you have any other comments or concerns?
